# Supplementary material for: Pharmacognostic and pharmacological evaluation ofEulaliopsis binataplant extracts by measuringin vitro/in vivosafety profile and anti-microbial potential
Source: Royal Society of Chemistry journal article supplement (doi:10.1039/c8tx00017d), 2018-01-01
Supplement: c8tx00017d1.pdf [file c8tx00017d1.pdf]

# Visual representation for anti-bacterial assay

**Escherichia coli genus**

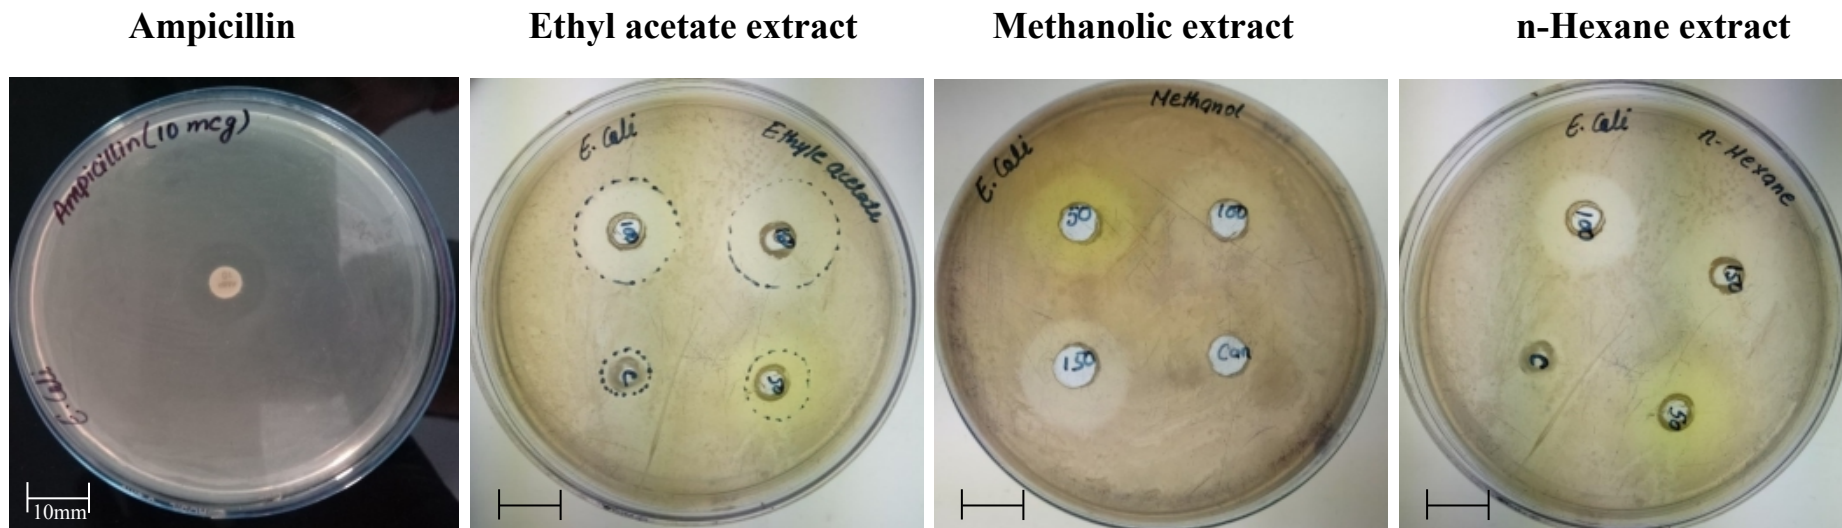

**Bacillus sp genus**

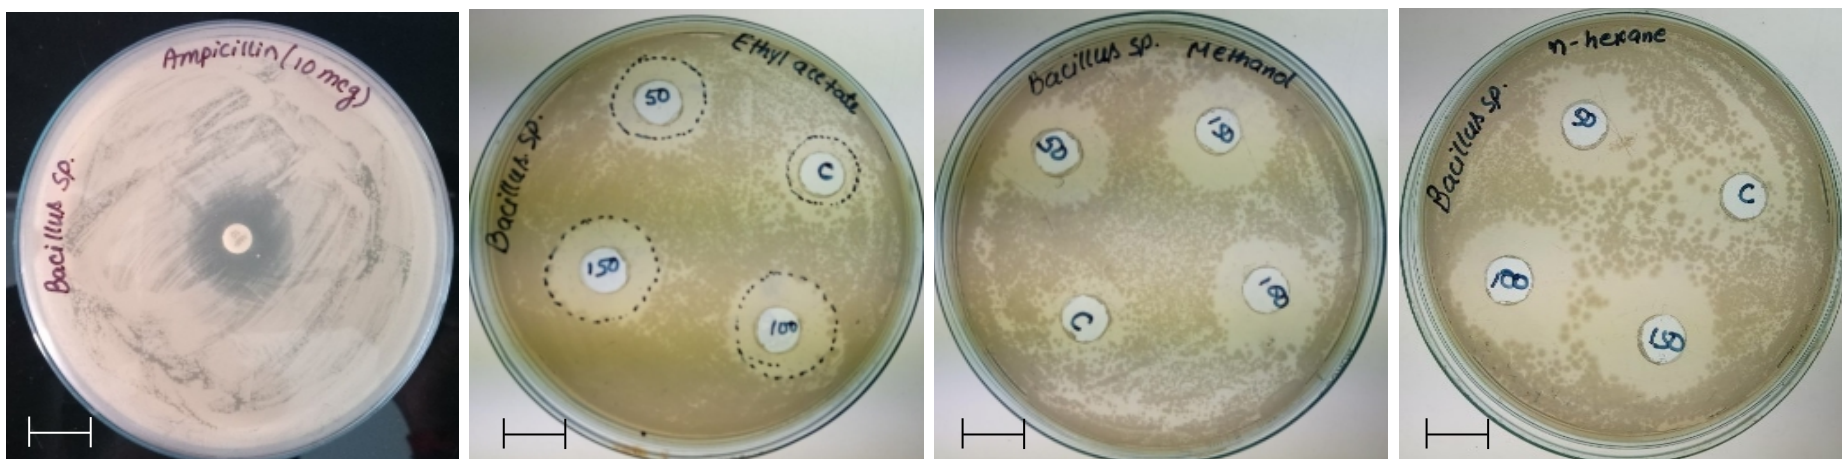

Zone of inhibition observed by different concentration of ethyl acetate extract, methanolic extract, n-hexane extract and standard dose of ampicillin against *E. Coli* and *Bacillus sp.* genus to detect the anti-bacterial potency.
